# Supplementary material
Source: publisher figshare collection journal article supplement (https://acs.figshare.com/ndownloader/files/4227229)
Supplement: Supplementary file 1 [file 4227229]

**Supporting Information (SI) for**

**Copper(II)-Mediated Oxidative Transformation of *vic*-Dioxime to Furoxan: Evidence for a Copper(II)-Dinitrosoalkene Intermediate**

*Oindrila Das,<sup>a</sup> Sayantan Paria,<sup>a</sup> Ennio Zangrando,<sup>b</sup> and Tapan Kanti Paine<sup>a,\*</sup>*

<sup>a</sup>Department of Inorganic Chemistry, Indian Association for the Cultivation of Science, 2A & 2B Raja S. C. Mullick Road, Jadavpur, Kolkata-700032, India. Fax: +91-33-2473-2805; Phone: +91-33-2473-4971. Email: [ictkp@iacs.res.in](mailto:ictkp@iacs.res.in)

<sup>b</sup>Dipartimento di Scienze Chimiche e Farmaceutiche, University of Trieste, Via Licio Giorgieri 1, 34127 Trieste, Italy.

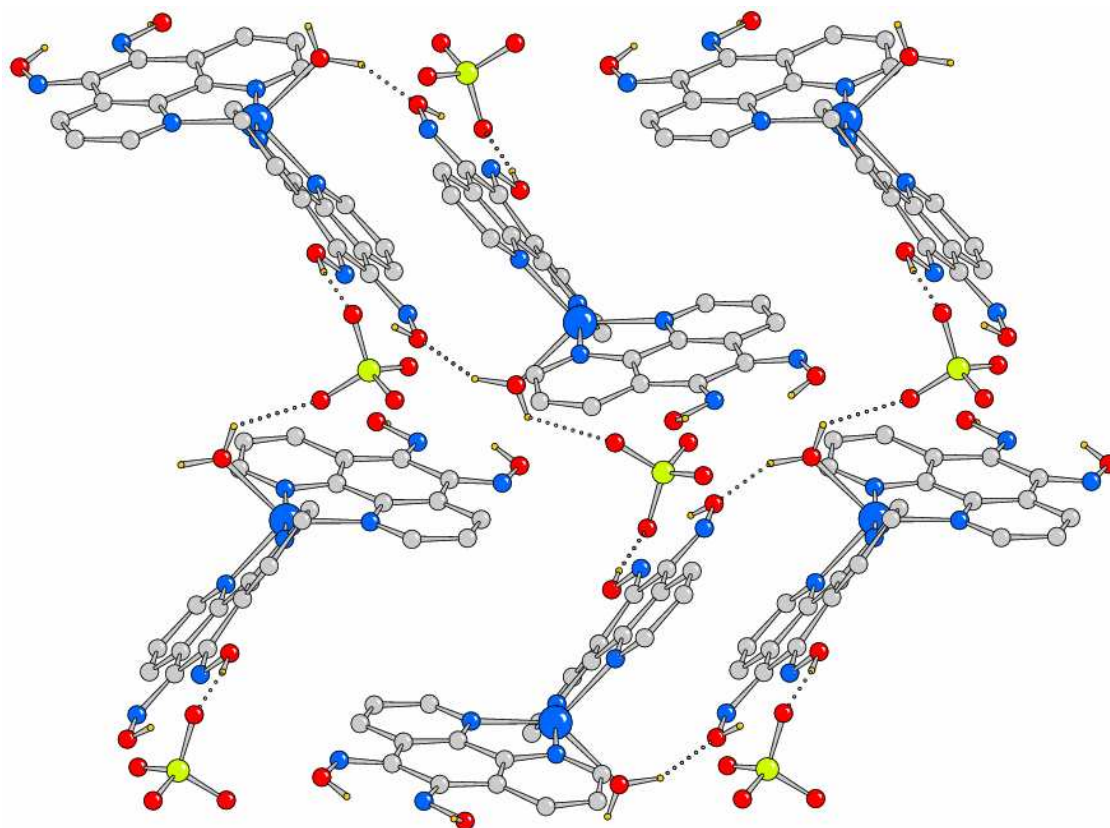

**Figure S1.** Two-dimensional hydrogen-bonded network involving the complex cations of **1**, water molecules and perchlorate counterions.

**Kinetic measurements in the presence of external substrates:** An acetonitrile solution (3.0 mL) of  $[\text{Cu}(\text{HDMG})_2]$  (0.25 mM) was taken in a cuvette of 1 cm pathlength. The cuvette was placed in the sample holder of the diode-array spectrometer maintained at  $-20^\circ\text{C}$  using a cryostat. An acetonitrile solution of copper(II) perchlorate hexahydrate (3 equivalent) was then added to the cuvette using a microlitre syringe. Formation of the blue intermediate was monitored at  $-20^\circ\text{C}$ . When the peak at 615 nm was reached at the

maximum absorbance, ten equivalents of intercepting agent were added and the decay of the peak at 615 nm was monitored.

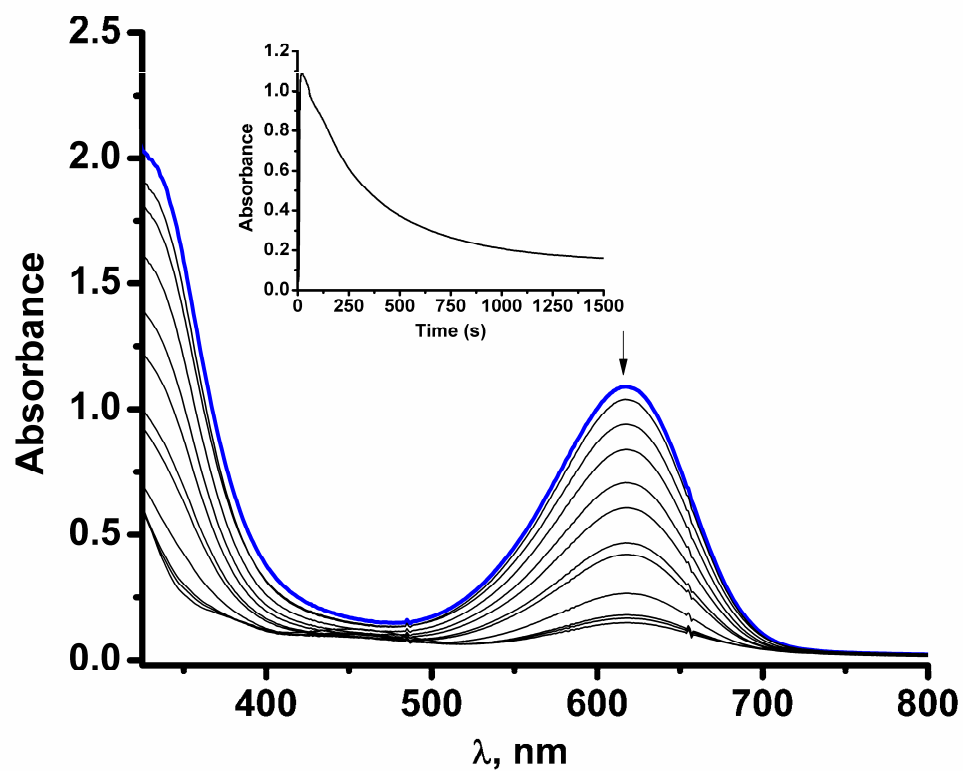

**Figure S2.** Decay of the intermediate at 615 nm generated from  $[\text{Cu}(\text{HDMG})_2]$  in the presence of 10 equivalents of TEMPOH.

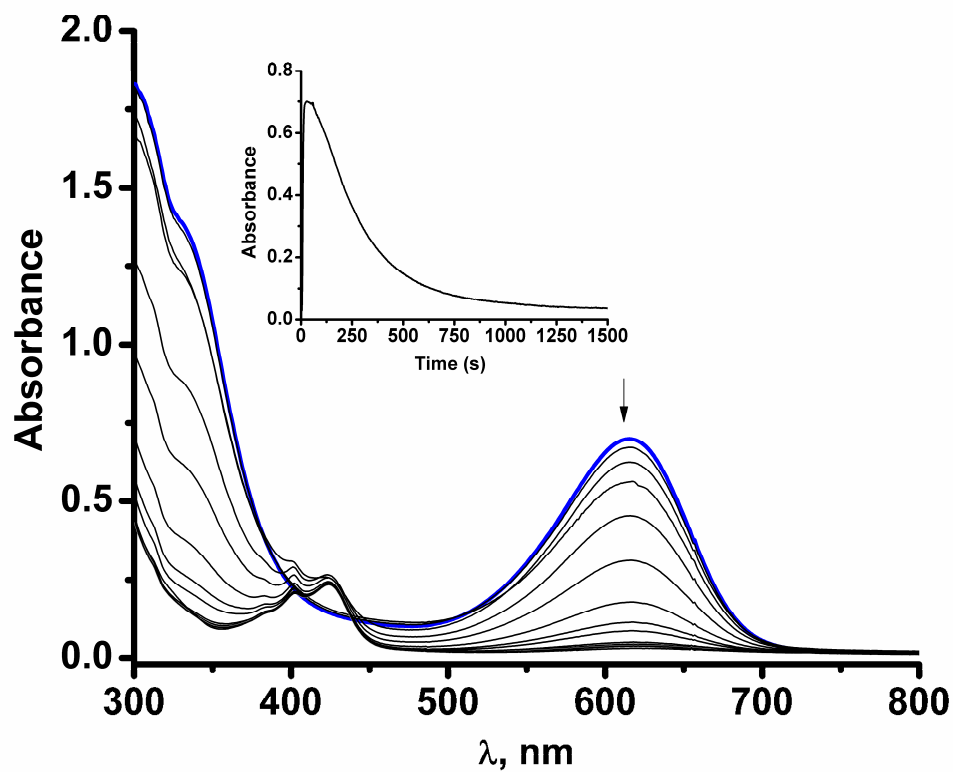

**Figure S3.** Decay of the intermediate at 615 nm generated from  $[\text{Cu}(\text{HDMG})_2]$  in the presence of 10 equivalents of 2,4,6-tri-*tert*-butylphenol.

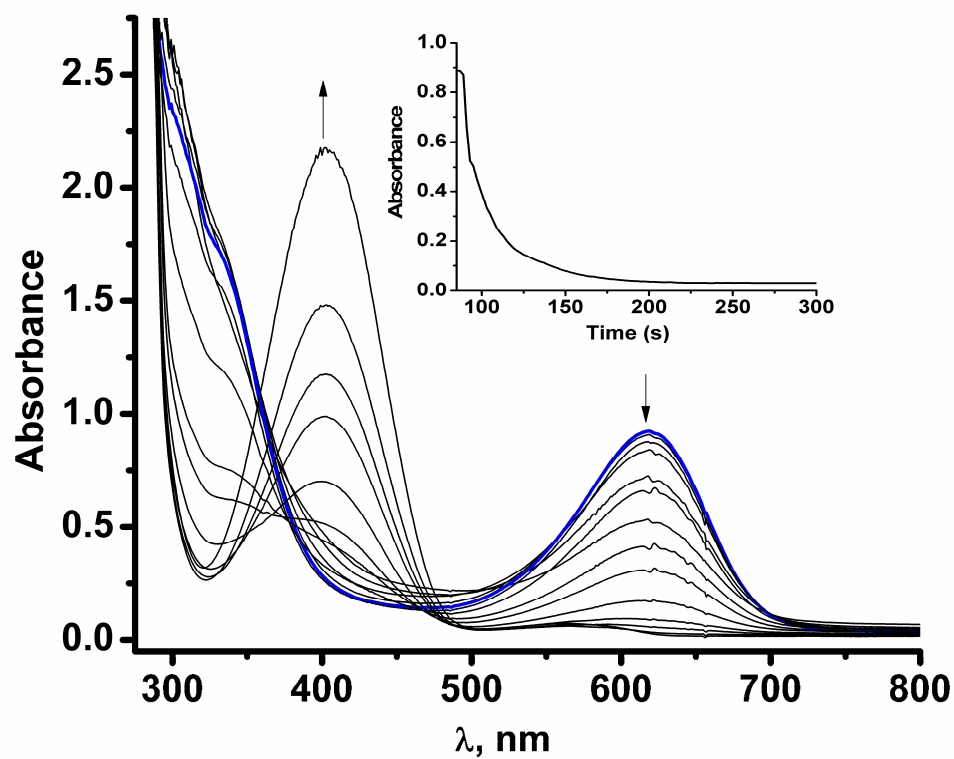

**Figure S4.** Decay of the intermediate at 615 nm generated from  $[\text{Cu}(\text{HDMG})_2]$  in the presence of 10 equivalents of 3,5-di-*tert*-butylcatechol. The peak at 400 nm indicates the formation of 3,5-di-*tert*-butylquinone.

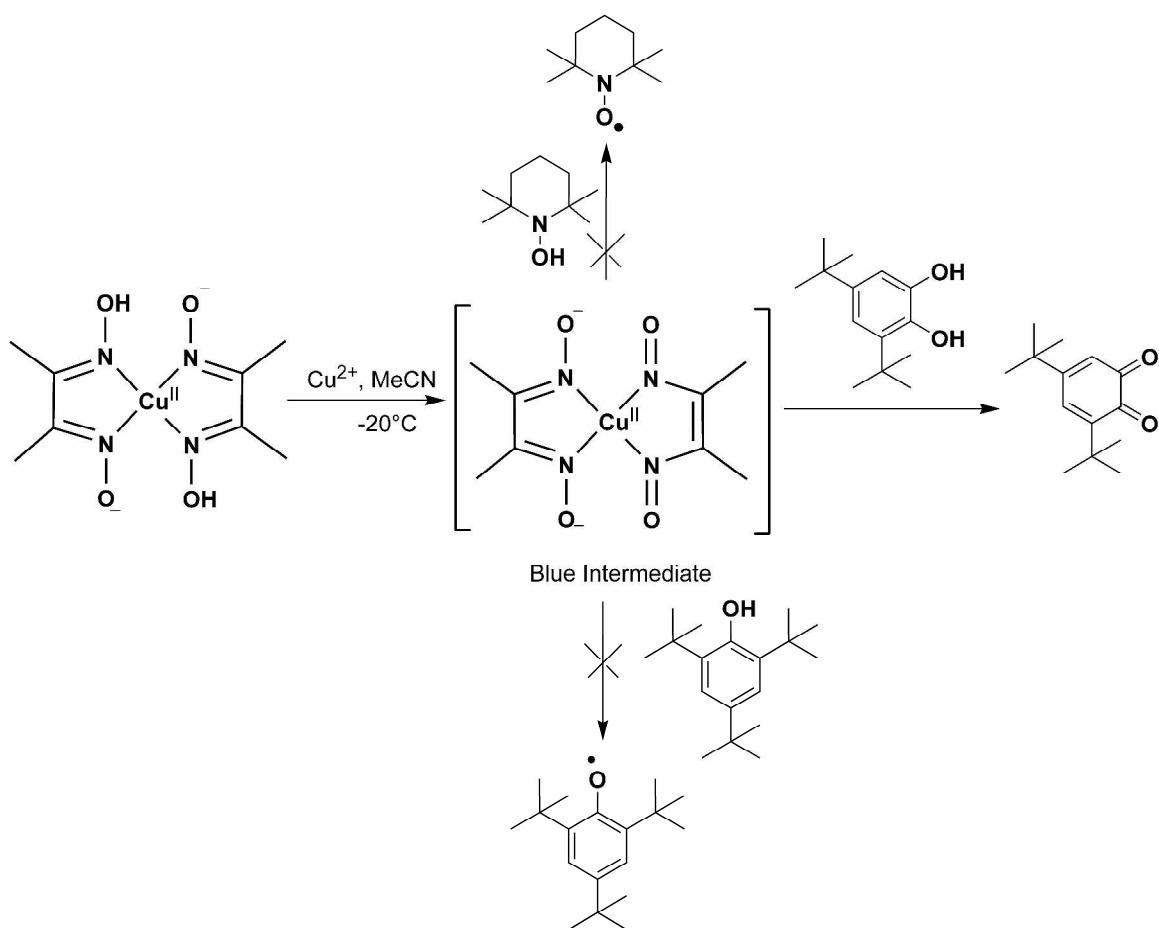

**Scheme S1.** Reaction of blue intermediate with different intercepting reagents.
